# Supplementary material for: Techno-Functional and Sensory Characterization of Commercial Plant Protein Powders
Source: MDPI journal article supplement (doi:10.3390/foods12142805), 2023-07-24
Supplement: s1 [file s1]

# Techno-functional and sensory characterization of commercial plant protein powders

Kadi Jakobson, Aleksei Kaleda, Karl Adra, Mari-Liis Tammik, Helen Vaikma, Tiina Kriščiunaite and Raivo Vilu

## Supplementary information

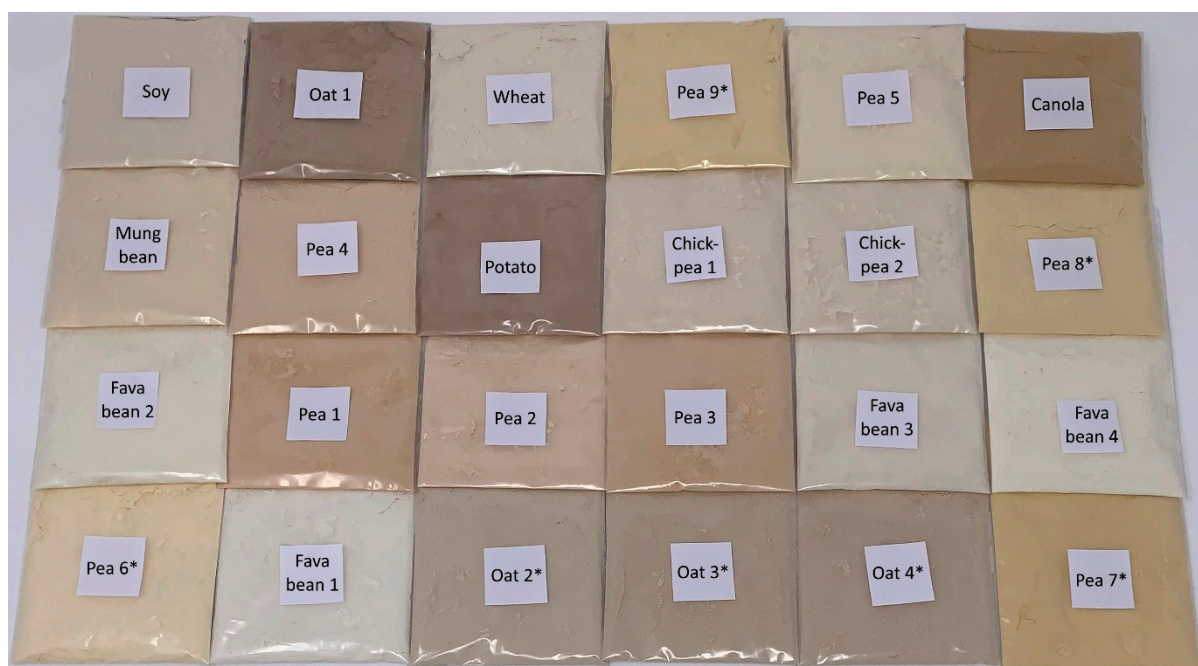

**Figure S1.** Photo of commercial protein powders prepared for color measurement.

**Table S1.** Nutritional composition according to manufacturers' specifications and native pH.

| <b>Sample</b> | <b>Protein, % dwb</b> | <b>Fat, % dwb</b> | <b>Carbohydrates, % dwb</b> | <b>Ash, % dwb</b> | <b>Native pH</b> |
|---------------|-----------------------|-------------------|-----------------------------|-------------------|------------------|
| Canola        | 90                    | -                 | -                           | 5                 | 6.13             |
| Chickpea 1    | 89                    | 0                 | 1                           | 4                 | 6.95             |
| Chickpea 2    | 89                    | 0                 | 2                           | 3                 | 6.95             |
| Fava bean 1   | 60                    | 4                 | 25                          | -                 | 6.54             |
| Fava bean 2   | 60                    | 4                 | -                           | -                 | 6.70             |
| Fava bean 3   | 88                    | 5                 | 1                           | 6                 | 6.45             |
| Fava bean 4   | 60                    | 3                 | 18                          | -                 | 6.72             |
| Mung bean     | 85                    | 4                 | 1                           | 3                 | 7.07             |
| Oat 1         | 59                    | 9                 | 27                          | 4                 | 6.01             |
| Oat 2*        | 56                    | 13                | 21                          | 3                 | 6.55             |
| Oat 3*        | 56                    | 13                | 21                          | 3                 | 6.55             |
| Oat 4*        | 56                    | 13                | 21                          | 3                 | 6.61             |
| Pea 1         | 85                    | -                 | -                           | 5                 | 7.35             |
| Pea 2         | 85                    | 9                 | 0                           | 6                 | 7.39             |
| Pea 3         | 84                    | 9                 | 0                           | 5                 | 7.46             |
| Pea 4         | 80                    | 5                 | 2                           | 9                 | 7.10             |
| Pea 5         | 90                    | -                 | -                           | 4                 | 7.56             |
| Pea 6*        | 80                    | 9                 | 4                           | 5                 | 7.02             |
| Pea 7*        | 80                    | 9                 | 4                           | 5                 | 6.60             |
| Pea 8*        | 80                    | 9                 | 4                           | 5                 | 7.10             |
| Pea 9*        | 80                    | 9                 | 4                           | 5                 | 7.11             |
| Potato        | 90                    | 0                 | 0                           | 5                 | 7.32             |
| Soy           | 90                    | 1                 | -                           | 6                 | 7.74             |
| Wheat         | 82                    | 5                 | 8                           | 1                 | 6.26             |

**Table S2.** CIELAB color. Mean (SD,  $n = 3$ ).

| Sample      | L*           | a*           | b*           |
|-------------|--------------|--------------|--------------|
| Canola      | 73.86 (0.11) | 4.01 (0.04)  | 24.31 (0.08) |
| Chickpea 1  | 93.64 (0.17) | -0.37 (0.04) | 18.45 (0.04) |
| Chickpea 2  | 94.49 (0.01) | -0.56 (0.11) | 10.57 (0.05) |
| Fava bean 1 | 85.04 (0.07) | 1.80 (0.08)  | 14.05 (0.12) |
| Fava bean 2 | 82.97 (0.22) | 1.91 (0.59)  | 14.86 (0.06) |
| Fava bean 3 | 85.49 (0.06) | 1.95 (0.09)  | 26.45 (0.06) |
| Fava bean 4 | 82.94 (0.13) | 1.85 (0.14)  | 14.44 (0.10) |
| Mung bean   | 74.38 (0.11) | 2.88 (0.10)  | 16.27 (0.10) |
| Oat 1       | 83.20 (0.29) | 4.15 (0.09)  | 18.95 (0.06) |
| Oat 2*      | 94.67 (0.13) | -0.69 (0.08) | 12.73 (0.04) |
| Oat 3*      | 83.10 (0.13) | 4.39 (0.09)  | 18.57 (0.11) |
| Oat 4*      | 87.84 (0.17) | 3.44 (0.03)  | 15.38 (0.12) |
| Pea 1       | 88.90 (0.26) | 1.04 (0.10)  | 17.85 (0.06) |
| Pea 2       | 85.16 (0.23) | 3.43 (0.04)  | 17.31 (0.06) |
| Pea 3       | 73.46 (0.09) | 4.03 (0.02)  | 15.73 (0.09) |
| Pea 4       | 89.37 (0.03) | -0.06 (0.05) | 15.21 (0.09) |
| Pea 5       | 88.83 (0.13) | -0.13 (0.13) | 14.46 (0.09) |
| Pea 6*      | 91.01 (0.28) | -0.15 (0.17) | 12.81 (0.28) |
| Pea 7*      | 94.63 (0.18) | -0.83 (0.15) | 12.42 (0.09) |
| Pea 8*      | 89.56 (0.07) | 0.08 (0.03)  | 14.80 (0.03) |
| Pea 9*      | 87.05 (0.08) | 0.96 (0.04)  | 24.78 (0.12) |
| Potato      | 90.52 (0.28) | -0.14 (0.10) | 13.06 (0.17) |
| Soy         | 87.87 (0.22) | 0.36 (0.07)  | 25.40 (0.13) |
| Wheat       | 90.89 (0.34) | -0.21 (0.03) | 15.70 (0.05) |

**Table S3.** Solubility. Mean (SD,  $n = 3$ ).

| <b>Sample</b> | <b>WSI [%]</b> | <b>Solubility, native pH [%]</b> | <b>Solubility, pH 4.5 [%]</b> |
|---------------|----------------|----------------------------------|-------------------------------|
| Canola        | 88.7 (0.1)     | 13.9 (0.7)                       | 10.7 (0.4)                    |
| Chickpea 1    | 16.4 (0.1)     | 26.7 (0.4)                       | 4.1 (0.2)                     |
| Chickpea 2    | 26.2 (1.2)     | 31.7 (0.4)                       | 19.7 (0.3)                    |
| Fava bean 1   | 59.3 (0.4)     | 49.7 (0.8)                       | 20.4 (0.7)                    |
| Fava bean 2   | 42.5 (0.4)     | 43.4 (0.3)                       | 18.7 (0.1)                    |
| Fava bean 3   | 8.7 (0.3)      | 5.5 (0.3)                        | 3.2 (0.1)                     |
| Fava bean 4   | 47.3 (0.5)     | 52.1 (0.1)                       | 27.3 (0.4)                    |
| Mung bean     | 15.3 (1.1)     | 6.4 (2.8)                        | 7.9 (0.3)                     |
| Oat 1         | 3.8 (0.1)      | 4.9 (0.1)                        | 6.2 (0.3)                     |
| Oat 2*        | 9.7 (0.0)      | 19.5 (0.2)                       | 18.8 (0.5)                    |
| Oat 3*        | 8.8 (0.1)      | 16.5 (0.1)                       | 16.9 (0.2)                    |
| Oat 4*        | 9.8 (0.1)      | 17.3 (0.4)                       | 17.7 (0.4)                    |
| Pea 1         | 36.7 (0.0)     | 45.8 (0.0)                       | 24.4 (0.0)                    |
| Pea 2         | 18.2 (0.2)     | 54.4 (0.4)                       | 4.2 (0.4)                     |
| Pea 3         | 17.2 (0.1)     | 52.9 (0.5)                       | 4.3 (0.3)                     |
| Pea 4         | 11.3 (0.3)     | 33.6 (0.3)                       | 2.9 (0.4)                     |
| Pea 5         | 42.1 (1.2)     | 92.7 (0.3)                       | 16.5 (0.9)                    |
| Pea 6*        | 42.6 (0.3)     | 13.9 (0.3)                       | 5.8 (0.2)                     |
| Pea 7*        | 9.5 (0.1)      | 12.1 (0.4)                       | 7.7 (0.1)                     |
| Pea 8*        | 16.3 (0.1)     | 37.5 (0.4)                       | 35.1 (0.3)                    |
| Pea 9*        | 13.9 (0.1)     | 36.1 (0.3)                       | 7.2 (0.5)                     |
| Potato        | 94.3 (0.0)     | 0.0 (0.0)                        | 0.0 (0.0)                     |
| Soy           | 24.3 (3.1)     | 93.6 (1.7)                       | 0.1 (0.5)                     |
| Wheat         | 8.6 (0.5)      | 12.8 (0.5)                       | 39.4 (2.8)                    |

**Table S4.** Water- and oil-holding capacities. Mean (SD,  $n = 3$ ).

| Sample      | WHC [g(H <sub>2</sub> O) g <sup>-1</sup> ] | OHC [g(oil) g <sup>-1</sup> ] |
|-------------|--------------------------------------------|-------------------------------|
| Canola      | -                                          | 2.77 (0.05)                   |
| Chickpea 1  | 2.56 (0.03)                                | 1.45 (0.00)                   |
| Chickpea 2  | 1.20 (0.08)                                | 1.28 (0.06)                   |
| Fava bean 1 | 0.62 (0.00)                                | 1.09 (0.00)                   |
| Fava bean 2 | 1.06 (0.01)                                | 0.90 (0.02)                   |
| Fava bean 3 | 1.85 (0.04)                                | 1.14 (0.05)                   |
| Fava bean 4 | 0.92 (0.01)                                | 0.83 (0.01)                   |
| Mung bean   | 2.31 (0.12)                                | 1.66 (0.01)                   |
| Oat 1       | 1.71 (0.08)                                | 1.13 (0.02)                   |
| Oat 2*      | 1.49 (0.01)                                | 0.87 (0.01)                   |
| Oat 3*      | 1.47 (0.04)                                | 0.96 (0.01)                   |
| Oat 4*      | 1.47 (0.00)                                | 0.87 (0.00)                   |
| Pea 1       | 1.17 (0.01)                                | 1.14 (0.01)                   |
| Pea 2       | 3.12 (0.05)                                | 0.80 (0.01)                   |
| Pea 3       | 3.22 (0.02)                                | 1.28 (0.00)                   |
| Pea 4       | 2.80 (0.03)                                | 1.22 (0.01)                   |
| Pea 5       | 3.52 (0.05)                                | 1.61 (0.32)                   |
| Pea 6*      | 0.85 (0.01)                                | 0.85 (0.01)                   |
| Pea 7*      | 1.63 (0.07)                                | 0.79 (0.01)                   |
| Pea 8*      | 2.19 (0.01)                                | 1.01 (0.01)                   |
| Pea 9*      | 2.27 (0.02)                                | 1.07 (0.01)                   |
| Potato      | -                                          | 2.09 (0.10)                   |
| Soy         | 6.27 (0.02)                                | 1.64 (0.09)                   |
| Wheat       | 1.47 (0.00)                                | 0.87 (0.01)                   |

**Table S5.** Foaming and emulsification properties. Mean (SD,  $n = 2$ ).

| Sample      | FC [%]     | FS [%]      | EA [%]     | ES [%]     |
|-------------|------------|-------------|------------|------------|
| Canola      | 67.1 (1.7) | 58.1 (5.7)  | 51.6 (2.3) | 67.7 (3.3) |
| Chickpea 1  | 62.8 (0.0) | 51.4 (2.0)  | 47.8 (0.0) | 50.5 (0.8) |
| Chickpea 2  | 84.1 (5.2) | 39.5 (1.3)  | 46.8 (3.0) | 51.1 (0.0) |
| Fava bean 1 | 44.8 (2.2) | 69.9 (4.6)  | 51.7 (0.8) | 48.1 (1.1) |
| Fava bean 2 | 21.5 (0.0) | 55.9 (3.3)  | 51.1 (0.0) | 53.1 (1.2) |
| Fava bean 3 | 41.9 (3.3) | 66.6 (2.0)  | 51.6 (0.7) | 52.2 (0.0) |
| Fava bean 4 | 24.4 (1.6) | 53.6 (0.4)  | 51.1 (1.5) | 51.6 (0.8) |
| Mung bean   | 32.6 (0.0) | 82.2 (0.6)  | 18.8 (2.9) | 45.4 (6.5) |
| Oat 1       | 14.3 (0.0) | 0.0 (0.0)   | 0.0 (0.0)  | 4.1 (0.1)  |
| Oat 2*      | 10.7 (1.7) | 7.1 (10.1)  | 22.9 (2.9) | 41.2 (2.3) |
| Oat 3*      | 9.4 (0.2)  | 0.0 (0.0)   | 12.7 (6.1) | 35.4 (1.9) |
| Oat 4*      | 18.6 (3.3) | 0.0 (0.0)   | 17.9 (4.2) | 44.3 (2.1) |
| Pea 1       | 44.8 (0.9) | 53.6 (7.7)  | 48.9 (1.5) | 52.6 (2.2) |
| Pea 2       | 44.2 (0.0) | 43.6 (2.7)  | 51.0 (1.5) | 50.5 (0.8) |
| Pea 3       | 34.9 (6.6) | 68.4 (13.2) | 49.4 (0.8) | 52.2 (0.0) |
| Pea 4       | 47.7 (1.6) | 49.0 (4.0)  | 51.0 (1.5) | 50.5 (2.2) |
| Pea 5       | 41.8 (2.9) | 53.4 (3.3)  | 52.5 (0.4) | 50.0 (0.8) |
| Pea 6*      | 21.8 (0.8) | 40.7 (5.2)  | 49.5 (0.7) | 51.4 (6.3) |
| Pea 7*      | 23.3 (3.3) | 31.0 (3.4)  | 50.5 (0.8) | 50.5 (0.8) |
| Pea 8*      | 22.7 (0.0) | 57.1 (0.0)  | 51.6 (2.3) | 50.0 (1.5) |
| Pea 9*      | 26.7 (1.6) | 54.8 (2.1)  | 48.9 (1.5) | 53.1 (1.5) |
| Potato      | 95.3 (0.0) | 66.3 (1.4)  | 49.5 (0.8) | 51.6 (0.7) |
| Soy         | 55.3 (1.1) | 70.2 (11.9) | 51.1 (1.5) | 52.6 (2.2) |
| Wheat       | 97.7 (3.3) | 54.1 (1.1)  | 51.6 (0.7) | 51.6 (2.3) |

**Table S6.** Sensory properties. Mean (SD,  $n = 9$ ).

| Sample      | O.<br>Overall<br>odor<br>intensity | O. Raw<br>material<br>odor | O. Off-<br>odor<br>intensity | T.<br>Overall<br>taste<br>intensity | T. Raw<br>material<br>taste | T.<br>Bitterness | T.<br>Astringency | T. Off-<br>taste<br>intensity | X.<br>Particle<br>size | X.<br>Amount<br>of<br>particles |
|-------------|------------------------------------|----------------------------|------------------------------|-------------------------------------|-----------------------------|------------------|-------------------|-------------------------------|------------------------|---------------------------------|
| Canola      | 8.6 (0.5)                          | 7.7 (1.0)                  | 1.0 (1.0)                    | 7.4 (0.9)                           | 6.4 (0.9)                   | 2.1 (0.9)        | 5.0 (0.9)         | 1.0 (1.0)                     | 0.7 (0.9)              | 0.7 (0.9)                       |
| Chickpea 1  | 8.5 (0.5)                          | 8.3 (0.8)                  | 0.5 (0.8)                    | 6.8 (1.0)                           | 6.0 (0.9)                   | 3.7 (0.8)        | 3.7 (1.0)         | 0.0 (0.0)                     | 1.5 (0.5)              | 4.0 (0.9)                       |
| Chickpea 2  | 7.7 (0.5)                          | 7.2 (1.0)                  | 0.5 (0.8)                    | 7.0 (0.9)                           | 6.8 (1.0)                   | 4.8 (1.0)        | 5.7 (1.0)         | 1.5 (0.5)                     | 1.8 (1.0)              | 5.0 (0.9)                       |
| Fava bean 1 | 8.7 (0.8)                          | 8.7 (0.8)                  | 0.0 (0.0)                    | 8.0 (0.9)                           | 8.0 (0.9)                   | 5.8 (1.0)        | 5.2 (1.0)         | 0.0 (0.0)                     | 1.3 (0.5)              | 2.0 (0.6)                       |
| Fava bean 2 | 7.7 (0.5)                          | 7.3 (0.8)                  | 0.7 (0.8)                    | 7.2 (0.8)                           | 6.7 (0.8)                   | 5.2 (1.0)        | 5.7 (1.0)         | 0.0 (0.0)                     | 1.5 (0.8)              | 4.7 (1.0)                       |
| Fava bean 3 | 8.0 (0.6)                          | 7.5 (0.5)                  | 0.0 (0.0)                    | 6.2 (1.0)                           | 5.8 (1.0)                   | 4.2 (0.8)        | 3.7 (0.5)         | 0.0 (0.0)                     | 2.0 (0.6)              | 5.0 (0.9)                       |
| Fava bean 4 | 6.3 (1.0)                          | 6.0 (0.9)                  | 0.0 (0.0)                    | 6.2 (1.0)                           | 5.7 (0.8)                   | 5.2 (1.0)        | 4.5 (1.0)         | 0.0 (0.0)                     | 1.2 (0.4)              | 4.0 (0.9)                       |
| Mung bean   | 8.7 (0.5)                          | 8.2 (1.0)                  | 3.8 (1.0)                    | 6.7 (0.8)                           | 5.8 (0.8)                   | 3.3 (1.0)        | 4.0 (0.9)         | 3.7 (0.8)                     | 2.8 (1.0)              | 6.3 (0.5)                       |
| Oat 1       | 6.9 (0.9)                          | 5.3 (1.0)                  | 2.0 (1.0)                    | 5.4 (0.5)                           | 4.9 (0.9)                   | 2.9 (0.9)        | 2.9 (0.9)         | 0.0 (0.0)                     | 1.9 (0.9)              | 6.7 (0.5)                       |
| Oat 2*      | 6.8 (0.4)                          | 6.7 (0.8)                  | 0.5 (0.5)                    | 6.0 (0.0)                           | 5.8 (0.4)                   | 2.2 (1.0)        | 2.7 (1.0)         | 0.0 (0.0)                     | 1.7 (0.8)              | 4.3 (0.8)                       |
| Oat 3*      | 7.0 (0.9)                          | 7.0 (0.9)                  | 0.0 (0.0)                    | 5.7 (0.8)                           | 5.7 (0.8)                   | 1.5 (0.8)        | 2.3 (0.8)         | 0.0 (0.0)                     | 1.7 (0.8)              | 4.2 (1.0)                       |
| Oat 4*      | 6.8 (0.4)                          | 6.8 (1.0)                  | 0.0 (0.0)                    | 5.2 (0.8)                           | 5.0 (0.6)                   | 2.0 (0.9)        | 2.7 (0.8)         | 0.0 (0.0)                     | 2.0 (0.9)              | 4.3 (1.0)                       |
| Pea 1       | 6.5 (0.5)                          | 5.7 (0.8)                  | 2.2 (0.8)                    | 6.3 (0.8)                           | 6.0 (0.9)                   | 4.8 (1.0)        | 5.2 (1.0)         | 0.0 (0.0)                     | 2.8 (1.0)              | 5.2 (0.8)                       |
| Pea 2       | 6.3 (0.5)                          | 6.3 (0.5)                  | 0.0 (0.0)                    | 6.0 (0.9)                           | 6.0 (0.9)                   | 4.8 (1.0)        | 5.0 (0.6)         | 0.0 (0.0)                     | 1.7 (0.5)              | 4.3 (0.8)                       |
| Pea 3       | 7.5 (0.8)                          | 7.5 (0.8)                  | 0.0 (0.0)                    | 6.3 (0.8)                           | 6.2 (0.8)                   | 4.7 (1.0)        | 4.5 (0.8)         | 0.0 (0.0)                     | 2.0 (0.0)              | 4.7 (0.5)                       |
| Pea 4       | 8.0 (0.0)                          | 6.2 (0.4)                  | 2.2 (1.0)                    | 6.0 (0.6)                           | 5.2 (0.8)                   | 3.3 (0.8)        | 4.5 (0.5)         | 1.2 (1.0)                     | 1.5 (0.5)              | 4.2 (1.0)                       |
| Pea 5       | 7.8 (1.0)                          | 6.8 (1.0)                  | 0.0 (0.0)                    | 6.2 (0.8)                           | 5.1 (0.9)                   | 5.2 (0.8)        | 5.3 (1.0)         | 0.0 (0.0)                     | 0.9 (0.9)              | 1.0 (0.9)                       |
| Pea 6*      | 7.5 (0.5)                          | 6.0 (0.9)                  | 1.8 (0.8)                    | 5.8 (0.8)                           | 5.2 (1.0)                   | 2.2 (1.0)        | 2.8 (1.0)         | 0.0 (0.0)                     | 2.3 (1.0)              | 4.8 (1.0)                       |
| Pea 7*      | 6.8 (1.0)                          | 5.8 (1.0)                  | 0.7 (1.0)                    | 5.5 (1.0)                           | 4.8 (0.8)                   | 2.0 (0.9)        | 2.2 (0.8)         | 0.0 (0.0)                     | 3.0 (0.9)              | 4.8 (1.0)                       |
| Pea 8*      | 8.3 (0.5)                          | 7.9 (0.9)                  | 1.9 (0.9)                    | 5.1 (0.9)                           | 5.0 (1.0)                   | 2.7 (1.0)        | 3.6 (0.5)         | 0.6 (1.0)                     | 1.1 (0.4)              | 3.3 (1.0)                       |
| Pea 9*      | 8.6 (0.5)                          | 7.8 (0.8)                  | 3.7 (0.9)                    | 6.7 (0.7)                           | 6.3 (1.0)                   | 3.6 (1.0)        | 4.2 (1.0)         | 0.7 (1.0)                     | 1.8 (0.8)              | 3.2 (1.0)                       |
| Potato      | 8.5 (0.5)                          | 6.7 (0.8)                  | 1.8 (1.0)                    | 6.0 (0.6)                           | 5.5 (0.8)                   | 2.2 (1.0)        | 2.8 (1.0)         | 0.7 (1.0)                     | 0.5 (0.5)              | 0.8 (1.0)                       |
| Soy         | 7.0 (1.0)                          | 6.0 (1.0)                  | 0.4 (0.8)                    | 5.0 (1.0)                           | 4.9 (0.9)                   | 4.0 (1.0)        | 3.7 (1.0)         | 0.0 (0.0)                     | 0.3 (0.5)              | 0.3 (0.5)                       |
| Wheat       | 8.0 (1.0)                          | 7.2 (1.0)                  | 1.7 (0.9)                    | 5.2 (1.0)                           | 3.4 (0.9)                   | 2.7 (0.9)        | 4.2 (1.0)         | 0.3 (0.7)                     | 2.9 (0.9)              | 2.4 (0.7)                       |
